# Supplementary material for: Carbon nanowalls as a platform for biological SERS studies
Source: PubMed Central journal article supplement (PMC5645332; doi:10.1038/s41598-017-13087-8), 2017-10-17
Supplement: 41598_2017_13087_MOESM1_ESM.pdf [file 41598_2017_13087_MOESM1_ESM.pdf]

Supplementary material for manuscript:

## Carbon nanowalls as a platform for biological SERS studies.

Pavel Dyakonov<sup>1\*</sup>, Kirill Mironovich<sup>1</sup>, Sergey Svyakhovskiy<sup>2</sup>, Olga Voloshina<sup>2</sup>, Sarkis Dagesyan<sup>2</sup>, Andrey Panchishin<sup>2</sup>, Nikolay Suetin<sup>1</sup>, Victor Bagratashvili<sup>3</sup>, Petr Timashev<sup>3,4</sup>, Evgeny Shirshin<sup>2</sup>, Stanislav Evlashin<sup>5</sup>

<sup>1</sup> D. V. Skobeltsyn Institute of Nuclear Physics, M. V. Lomonosov Moscow State University, Moscow, 119991, Russia

<sup>2</sup> Department of Physics, M. V. Lomonosov Moscow State University, Moscow, 119991, Russia

<sup>3</sup> Institute of Photonic Technologies, Research center "Crystallography and Photonics", RAS 2 Pionerskaya st., Troitsk, Moscow, 142190, Russia

<sup>4</sup> Institute for Regenerative Medicine, , Sechenov First Moscow State Medical University, 8-2 Trubetskaya st., Moscow, 119991, Russia

<sup>5</sup> Center for Design, Manufacturing and Materials, Skolkovo Institute of Science and Technology, Center for Design, Manufacturing and Materials, 3 Nobel Street, Moscow, 143026, Russia

Email: [djjakonov.pavel@physics.msu.ru](mailto:djjakonov.pavel@physics.msu.ru)

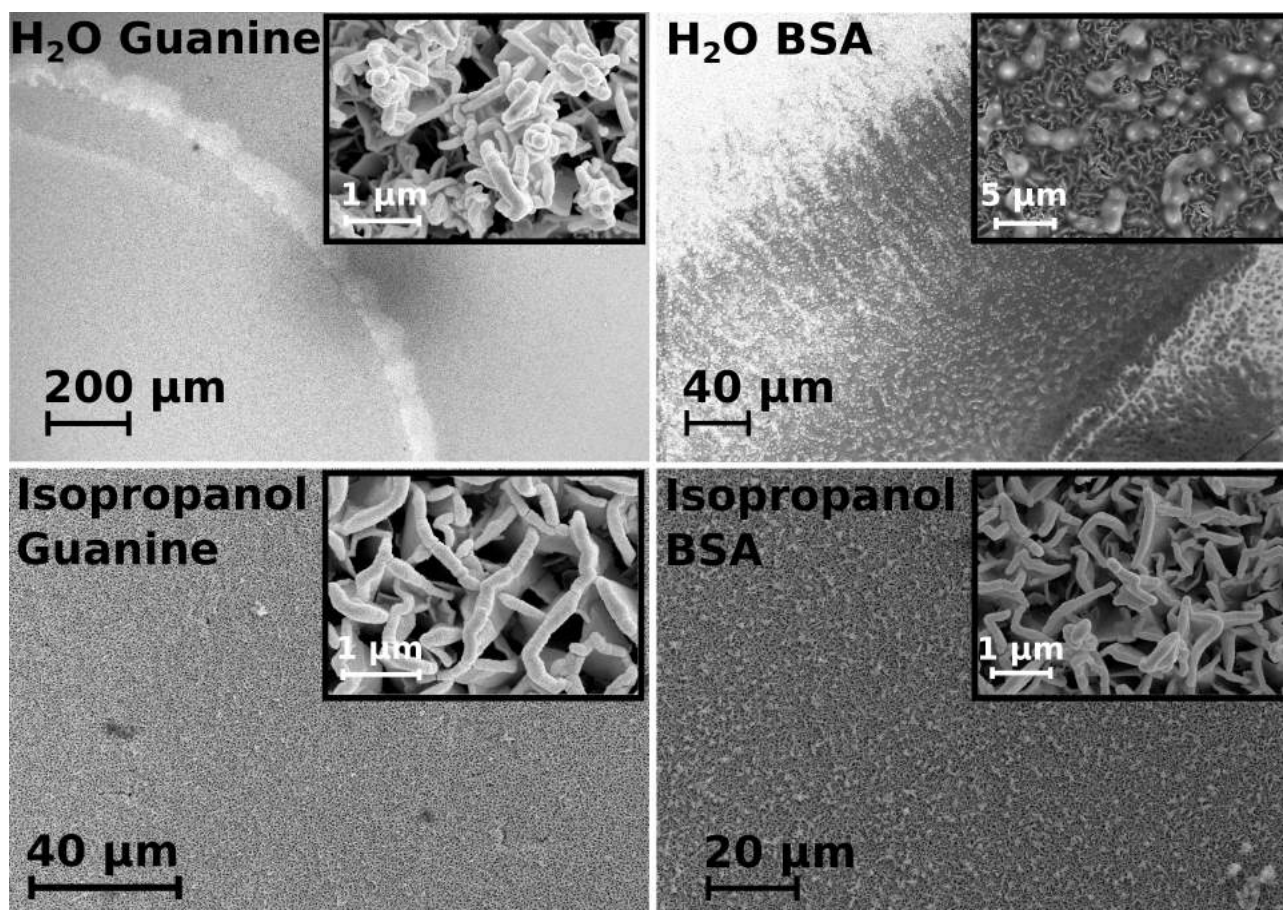

Figure S1. SEM images of drying process of analytes in different solvents (water and isopropanol).

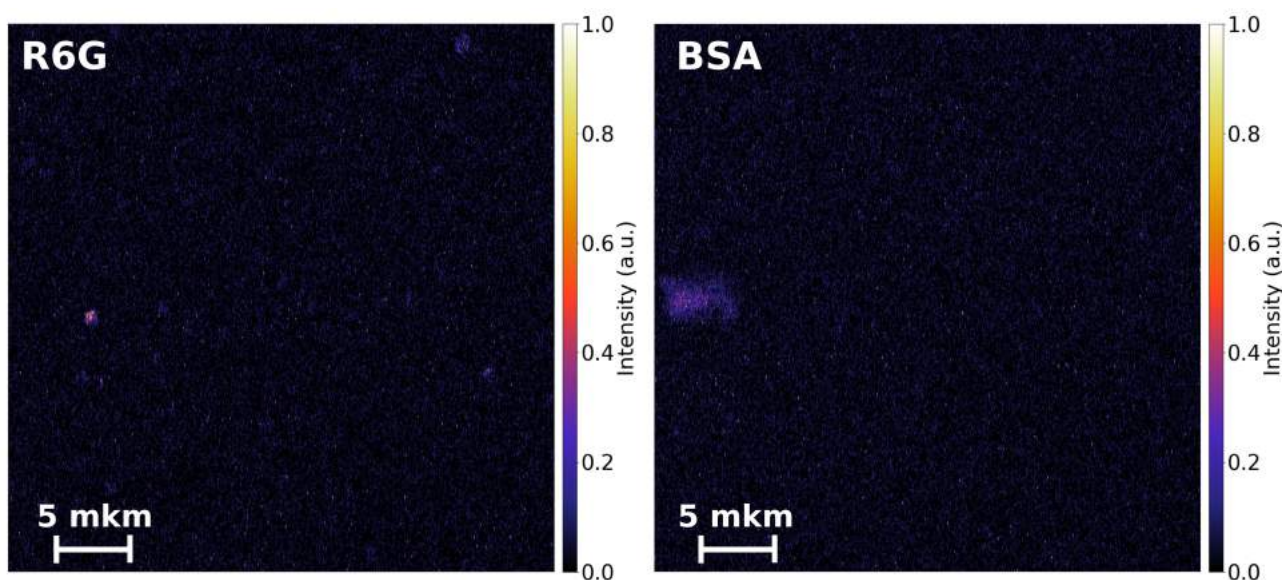

Figure S2. Spectral maps for 0.1 mkM of R6G and BSA solutions.

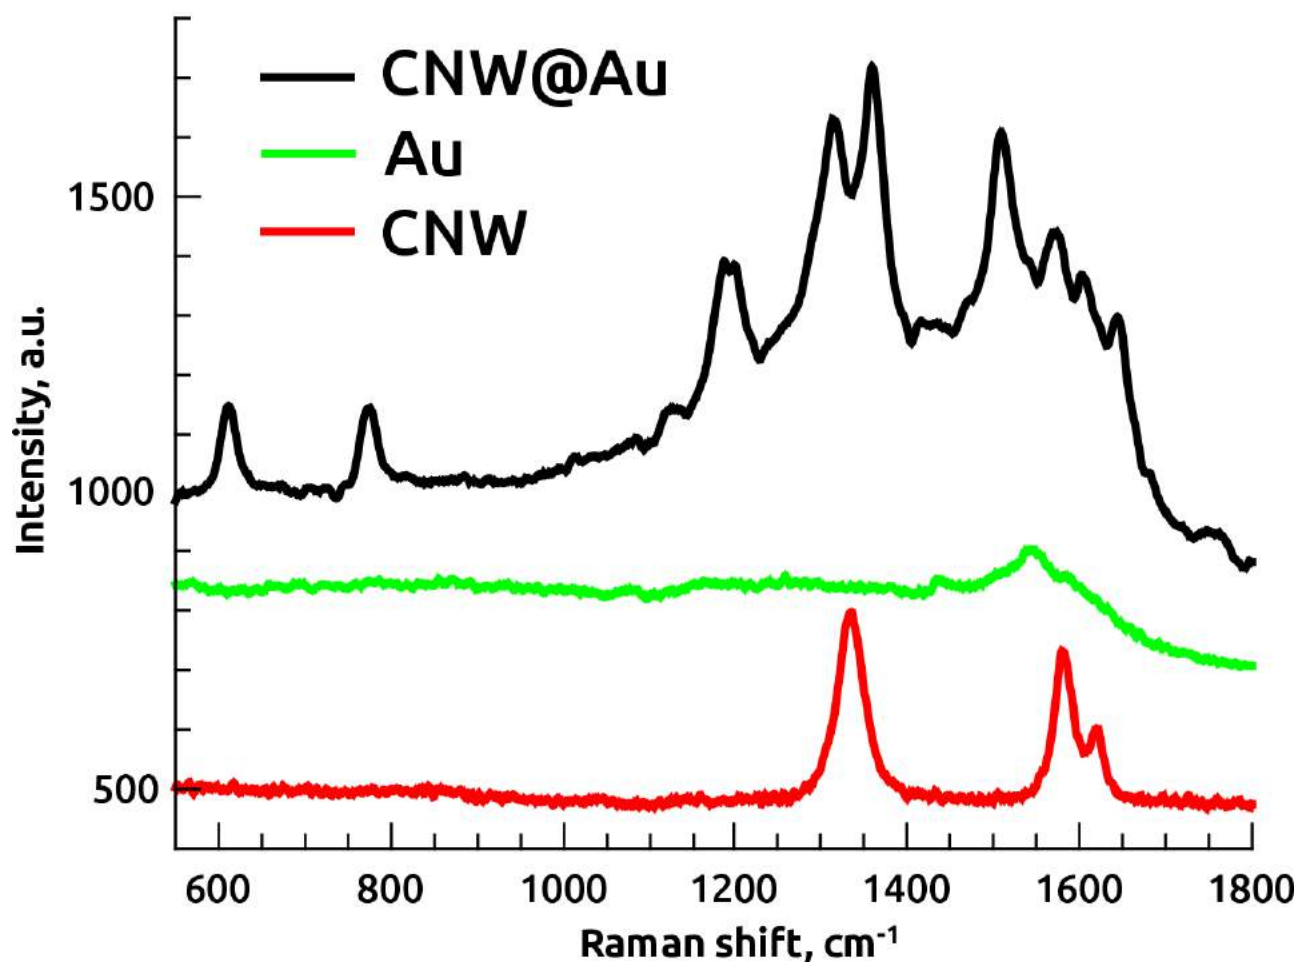

Figure S3. 1 mkM R6G solution applied to substrates of raw CNWs (red curve), plane Au (green curve) and CNW@Au.
